# Supplementary material for: HxMoO3−ynanobelts with sea water as electrolyte for high-performance pseudocapacitors and desalination devices
Source: Royal Society of Chemistry journal article supplement (doi:10.1039/c5ta05251c), 2015-01-01
Supplement: c5ta05251c1.pdf [file c5ta05251c1.pdf]

## Supporting Information

### $H_xMoO_{3-y}$ nanobelts for high-performance pseudocapacitors with sea water as electrolyte and desalination device

Liang Huang ‡<sup>a</sup>, Xiang Gao ‡<sup>a</sup>, Qiang Dong ‡<sup>b</sup>, Zhimi Hu <sup>a</sup>, Xu Xiao <sup>a</sup>, Tianqi Li <sup>a</sup>,  
Yongliang Cheng <sup>a</sup>, Bin Yao <sup>a</sup>, Jun Wan <sup>a</sup>, Dong Ding <sup>c</sup>, Zheng Ling <sup>b</sup>, Jieshan Qiu <sup>b</sup>  
and Jun Zhou <sup>a\*</sup>

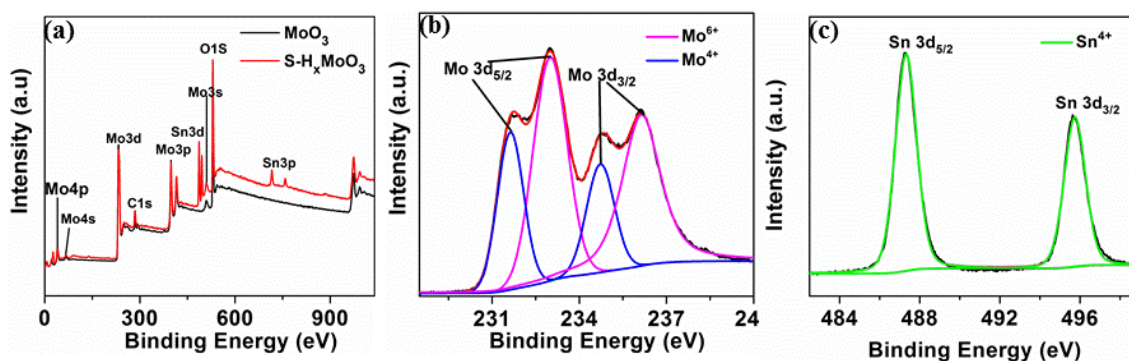

**Fig. S1.** (a) XPS of MoO<sub>3</sub> and S-H<sub>x</sub>MoO<sub>3-y</sub>; high resolution XPS spectra of S-H<sub>x</sub>MoO<sub>3-y</sub> and fitting curves, (b) Mo<sup>4+</sup>, Mo<sup>6+</sup> and (c) Sn<sup>4+</sup>.

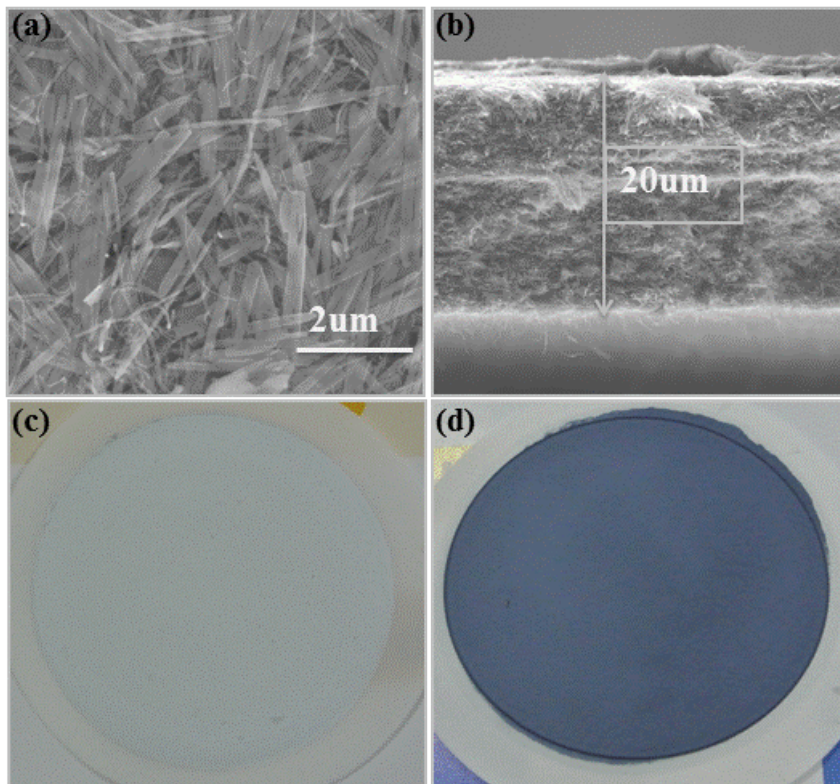

**Fig. S2.** (a) The hybrid film of  $1S-H_xMoO_{3-y}$  and CNT; (b) The thickness of this hybrid film; optical image of pristine  $MoO_3$  (c) and  $1S-H_xMoO_{3-y}$  film (d).

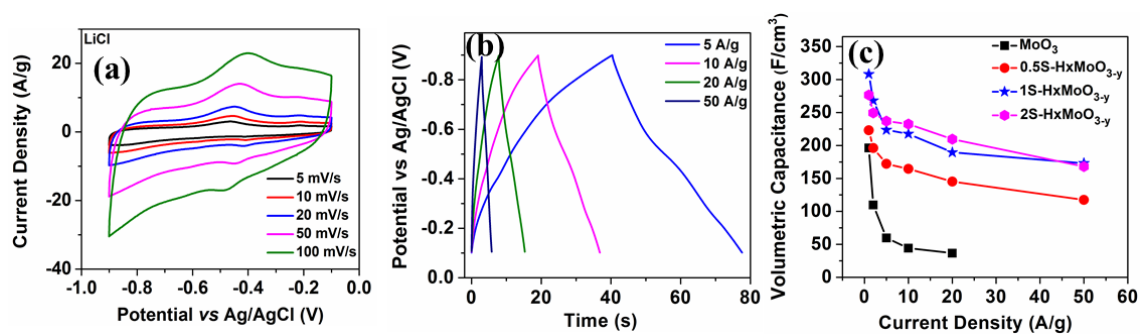

**Fig. S3.** CV curves (a) and CDG (b) specific capacitance of  $1S-H_xMoO_{3-y}$  in the 5 M LiCl solution; (c) specific capacitance of  $S-H_xMoO_{3-y}$  under different reaction time and  $MoO_3$ .

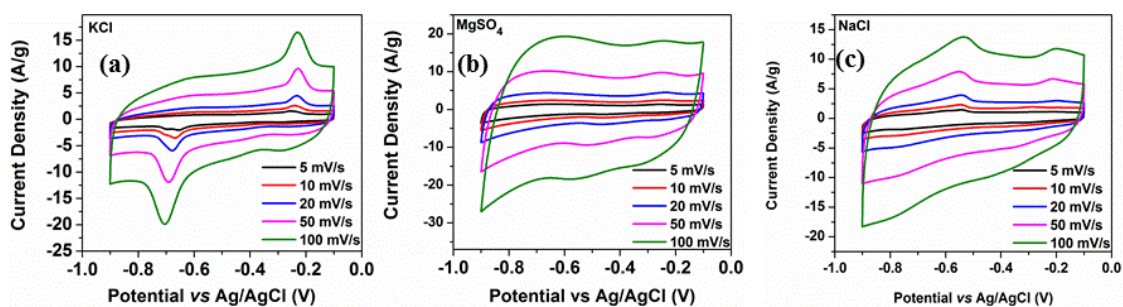

**Fig. S4.** CV curves of 1S-H<sub>x</sub>MoO<sub>3-y</sub> in the solution of (a) KCl, (b) MgSO<sub>4</sub> and (c) NaCl.

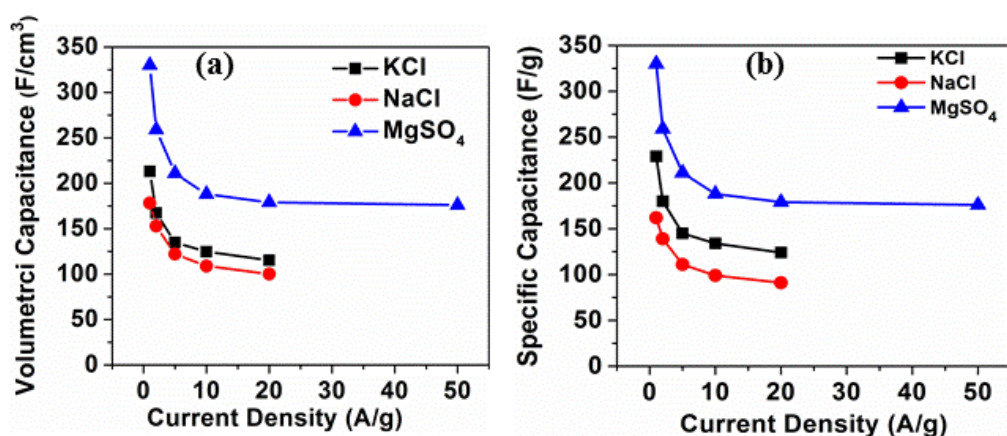

**Fig. S5.** (a) volumetric capacitance and (b) specific capacitance of 1S-H<sub>x</sub>MoO<sub>3-y</sub> in the different cations solution under current density from 1 A/g to 50 A/g.

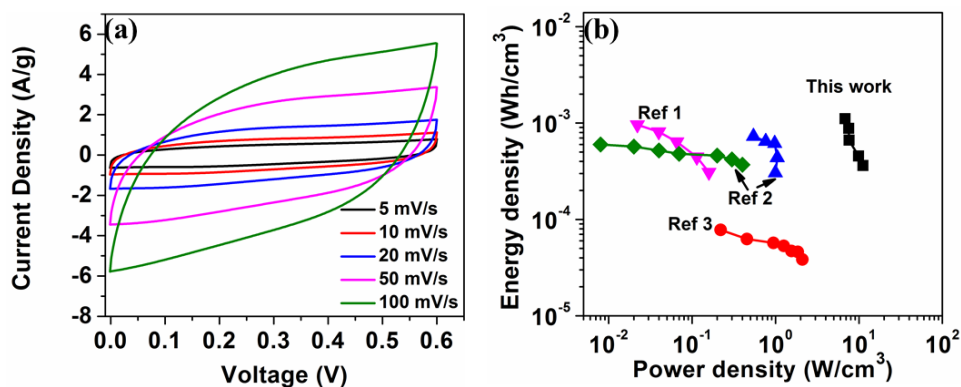

**Fig. S6.** (a) CV and (b) CDG curves of pristine MoO<sub>3</sub> in the 5 M LiCl solution.

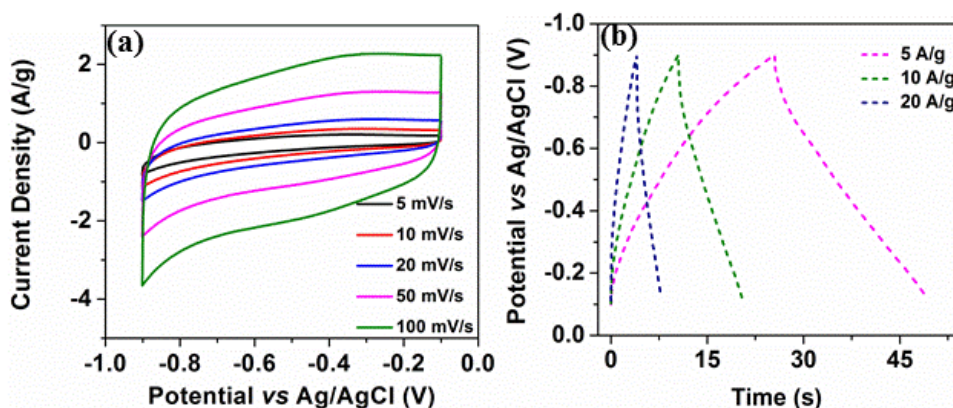

**Fig. S7.** (a) CV curves of symmetric device based on  $1S-H_xMoO_{3-y}$  electrode and (b) Ragone plots compared with the selected previous device.

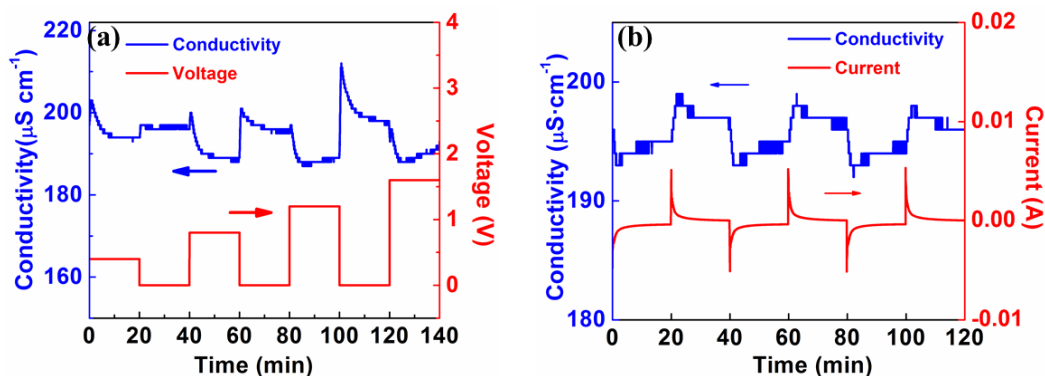

**Fig. S8.** (a) The electrodesorption–desorption performance of  $1S-H_xMoO_{3-y}$  and CNT hybrid film in NaCl solution by varying the cell voltage from 0.4 to 1.2 V; (b) current response and electrodesorptive capacity of CNT at the voltage of 1.2 V.

## Reference

- 1 M. R. Lukatskaya, O. Mashtalir, C. Ren, Y. D. Agnese, P. Rozier, P. L. Taberna, M. Naguib, P. Simon, M. W. Barsoum, Y. Gogotsi, *Science*, 2013, **341**, 1502.
- 2 D. Yu, K. Goh, H. Wang, L. Wei, W. Jiang, Q. Zhang, L. Dai, Y. Chen, *Nat. Nanotech.* 2014, **9**, 555-562.
- 3 L. Kou, T. Huang, B. Zheng, Y. Han, X. Zhao, K. Gopalsamy, H. Sun, C. Gao, *Nat. Commun.* 2014, **5**, 3754.
